# Supplementary material for: Biodegradation of anionic polyacrylamide mediated by laccase and amidase: docking, virtual mutation based on affinity and DFT study
Source: Royal Society of Chemistry journal article supplement (doi:10.1039/d1nj02411f), 2021-01-01
Supplement: d1nj02411f1.pdf [file d1nj02411f1.pdf]

# Biodegradation of anionic polyacrylamide mediated by laccase and amidase: docking, virtual mutation based on affinity and DFT study

WANG Fanglue<sup>1</sup>, ZHANG Dongchen<sup>1\*</sup>, WU Xuefeng<sup>2</sup>, DEND Shengsong<sup>2</sup>

1. College of Material Science and Engineering Anhui University of Science and Technology, Huainan 232001, China; 2. College of Food and Bioengineering Hefei University of Technology, Hefei 230009, China

\*Corresponding author. E-mail address: dchzhang202101@163.com

Journal: New Journal of Chemistry

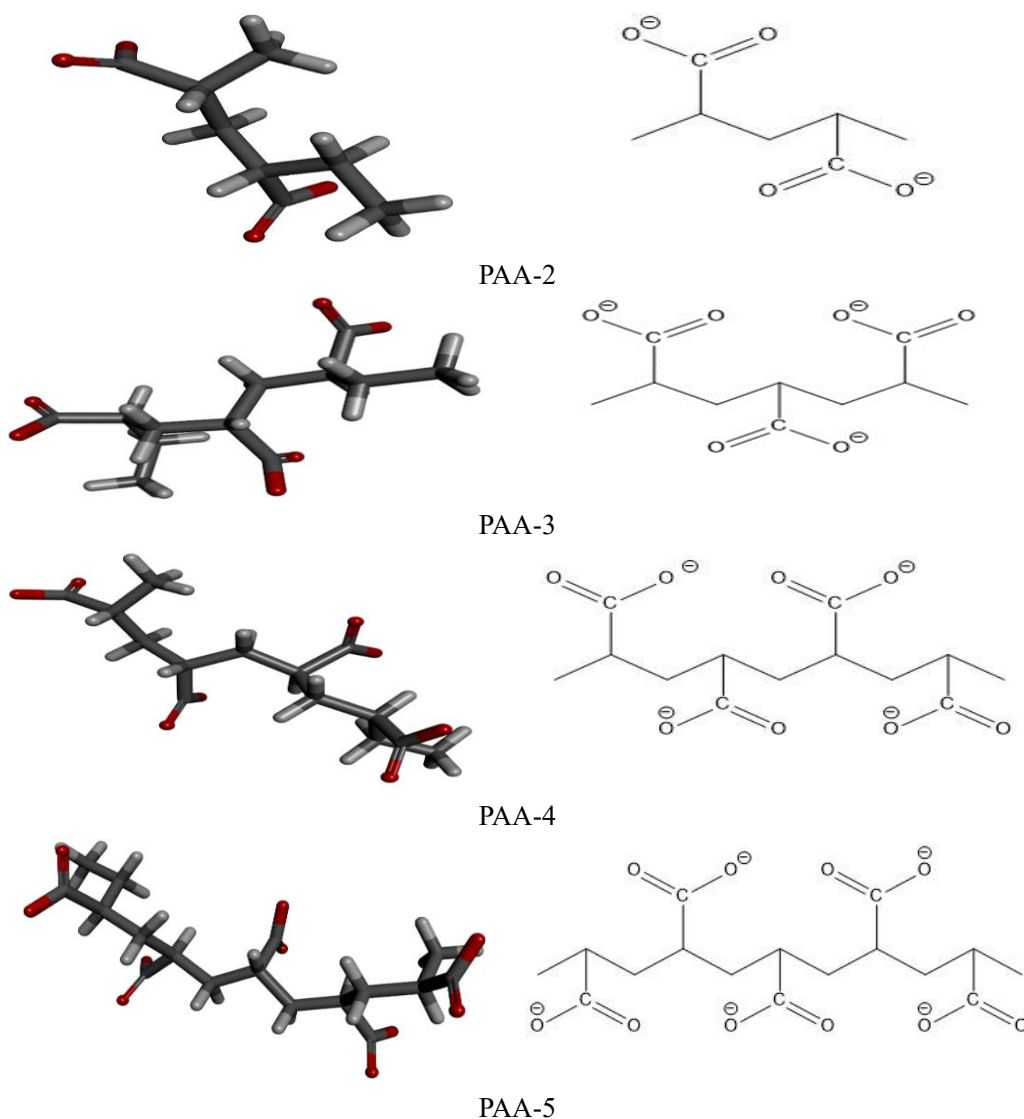

**Fig.S1** Minimized stick structural models of PAA (left) (Elements: gray: carbon; white: hydrogen; red: oxygen) and chemical structures of PAA (right)

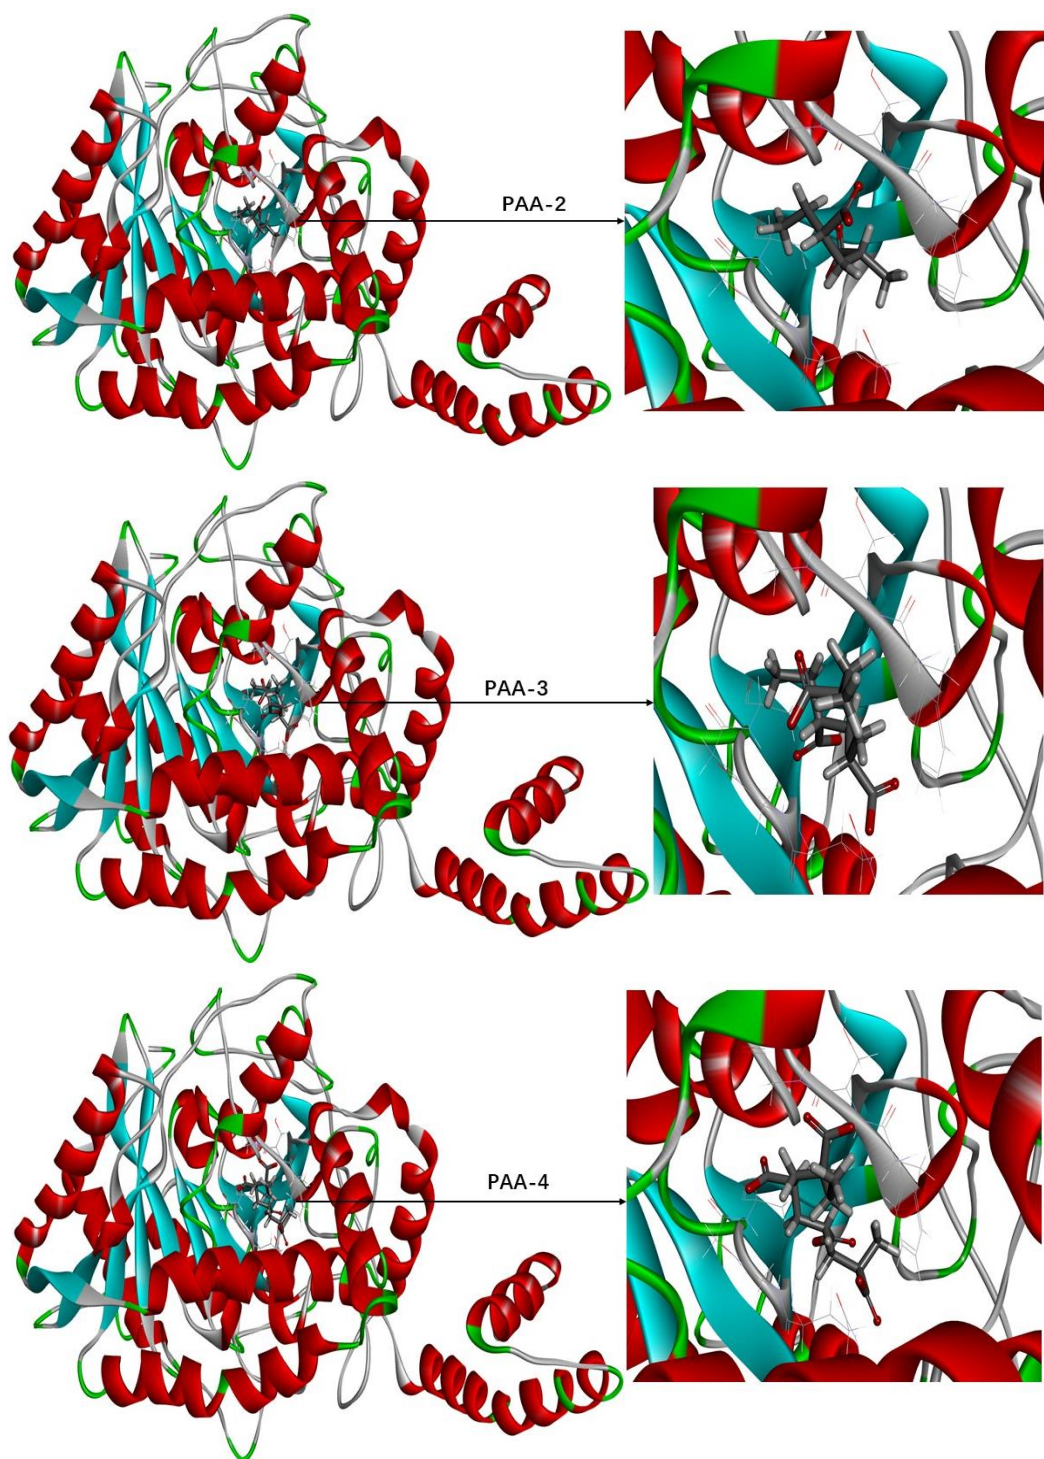

**Fig.S2** Binding mode of the PAA in Rh Amidase  
(The amino acids at the active site of Rh Amidase are showed as the line pattern, and the ligands are showed as stick model)

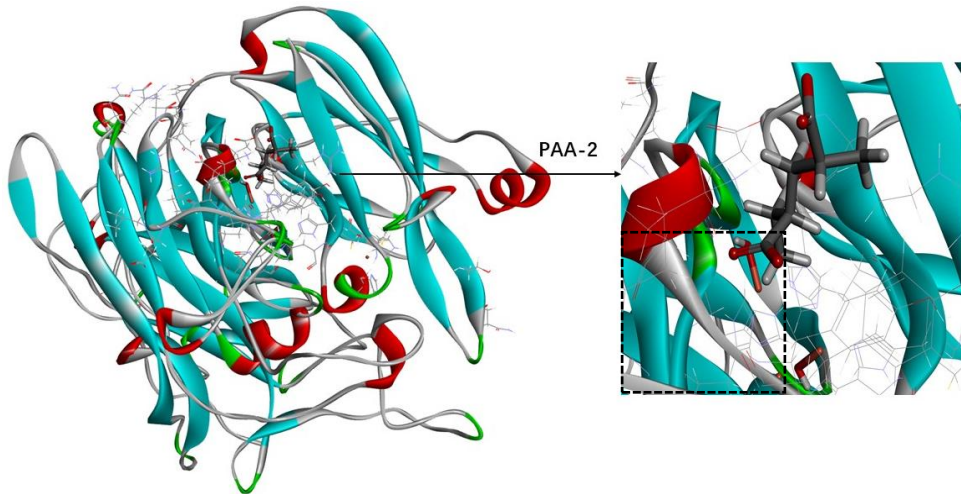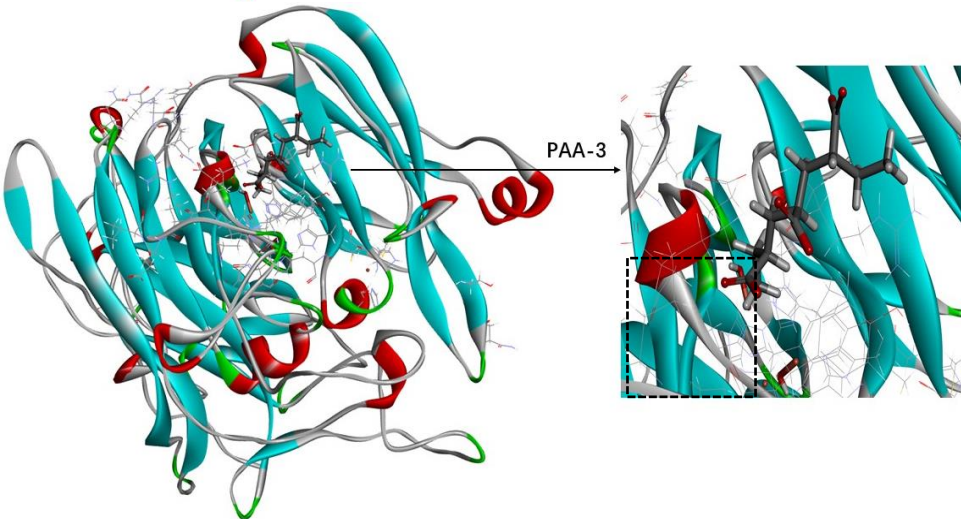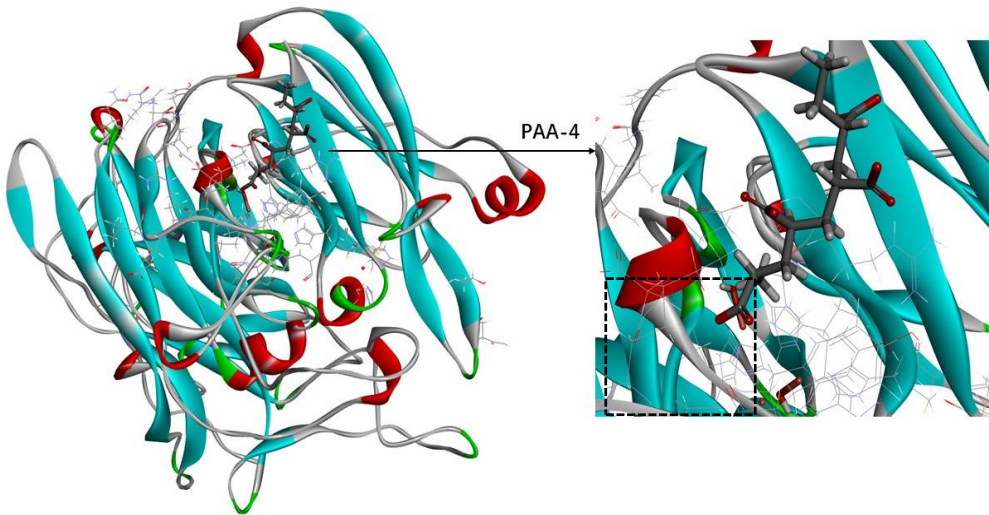

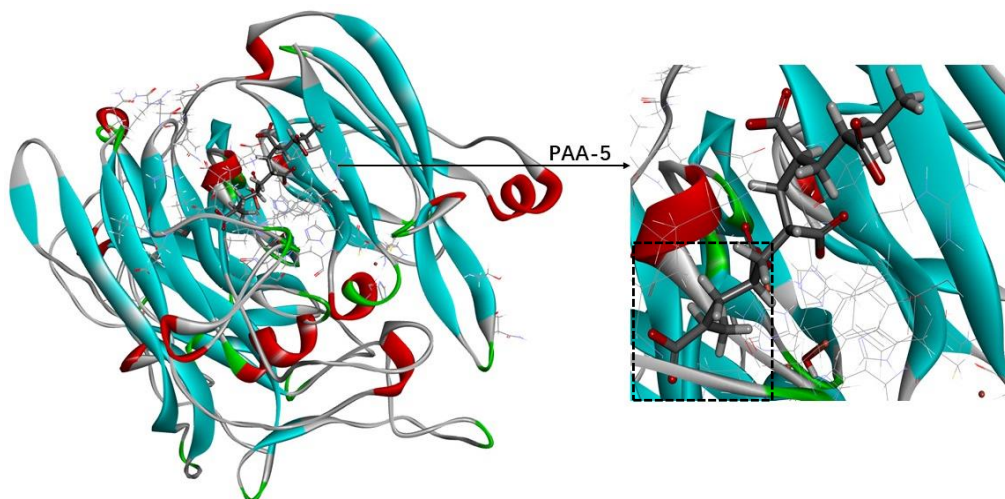

**Fig.S3** Binding mode of the PAA in *B. subtilis* laccase  
(The amino acids at the active site of *B. subtilis* laccase are showed as the line pattern, and the ligands are showed as stick model)

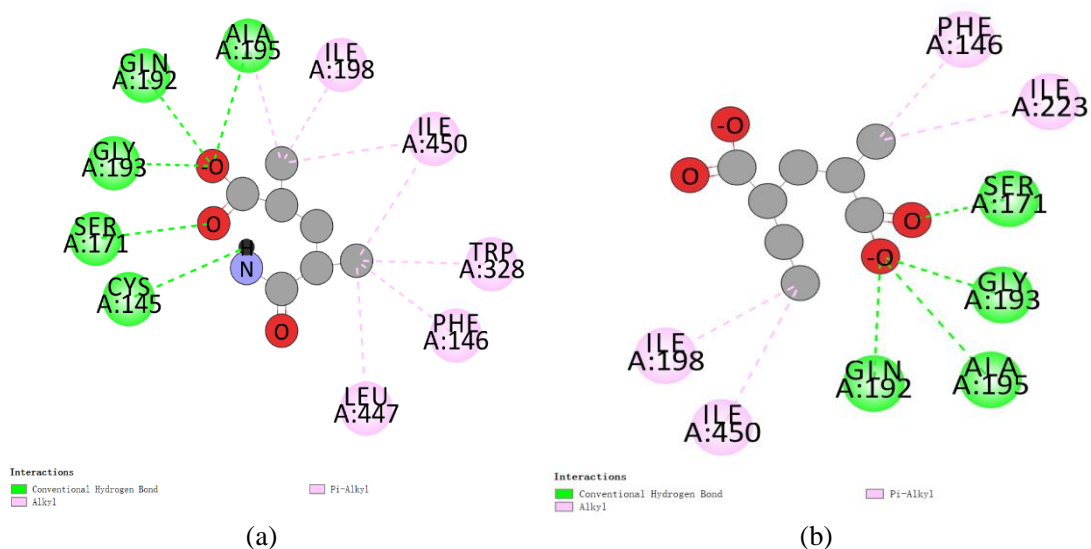

**Fig.S4** 2D interaction between Rh Amidase and HPAM-2(a) or PAA-2(b)

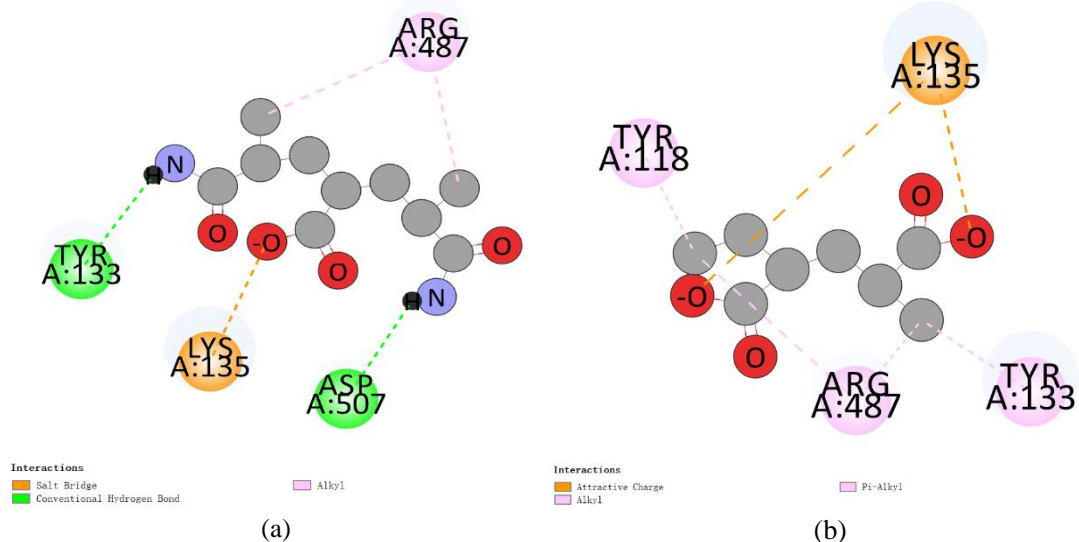

**Fig.S5** 2D interaction between *B. subtilis* laccase and HPAM-3(a) or PAA-2(b)
